# Supplementary material
Source: PubMed Central journal article supplement (PMC2931749)

Biophysical Journal, Volume 99

**Supporting Material**

**Diffusion of Particles in the Extracellular Matrix: the Effect of Repulsive Electrostatic Interactions**

Triantafyllos Stylianopoulos, Ming-Zher Poh, Numpon Insin, Mounqi G Bawendi, Dai Fukumura, Lance L Munn, and Rakesh K. Jain

# Supplementary Material

for the article:

## Diffusion of Particles in the Extracellular Matrix: the Effect of Repulsive Electrostatic Interactions

by T. Stylianopoulos, M-Z Poh, N. Insin, M. Bawendi, D. Fukumura, L. L. Munn, and R. K. Jain

### Supplementary figure 1

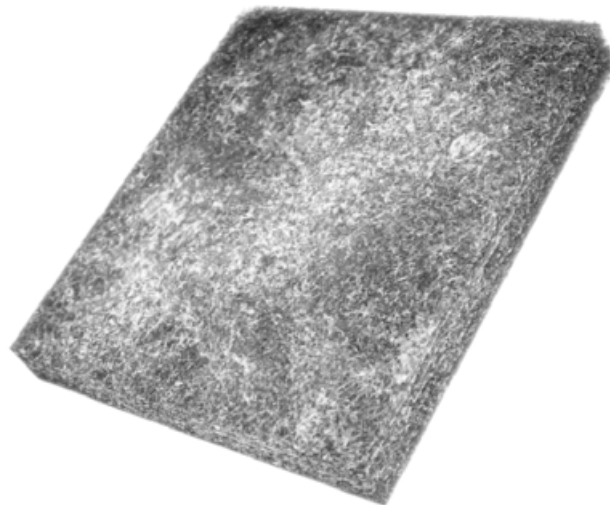

Three-dimensional rendering of collagen gel. 86 Second Harmonic Generation images were reconstructed, revealing three-dimensional nature of collagen organization. Dimensions are 223 x 223 x 25  $\mu m$ .

Supplementary figure 2

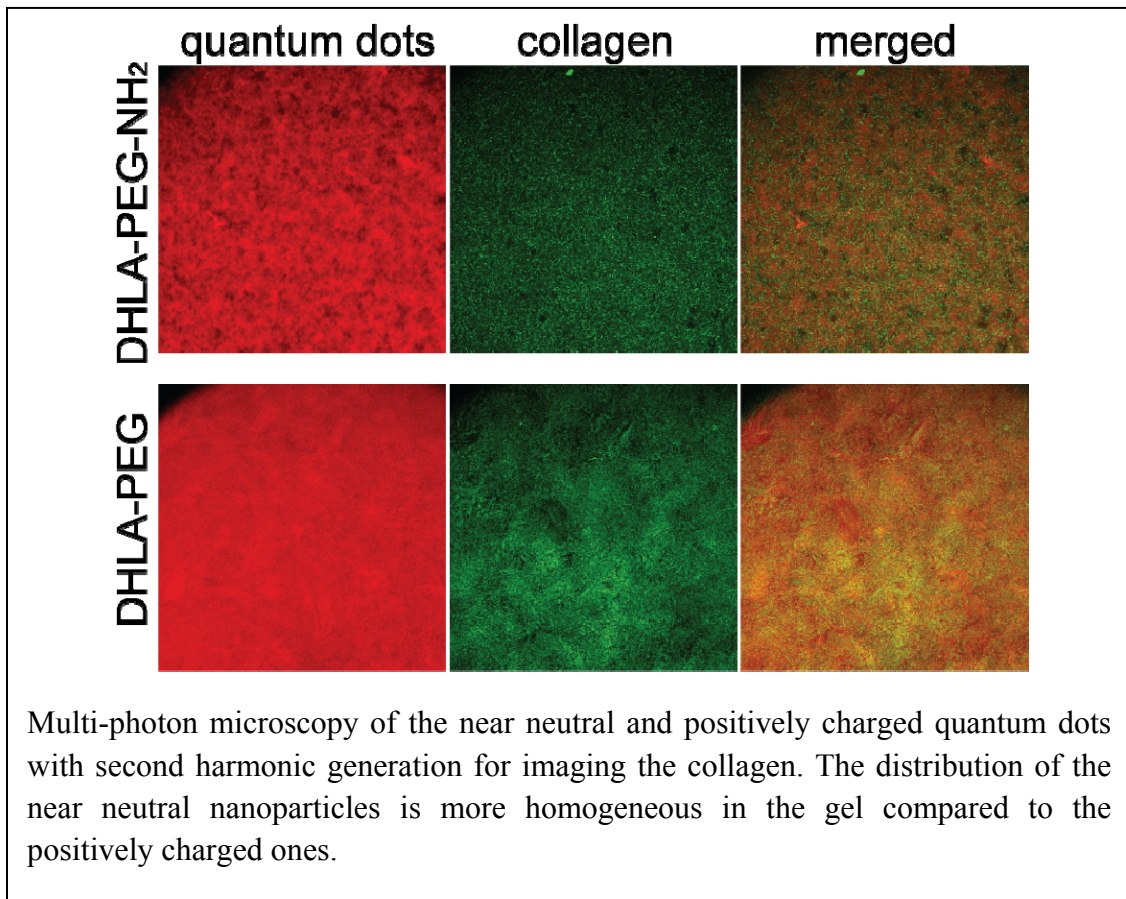

Supplementary figure 3

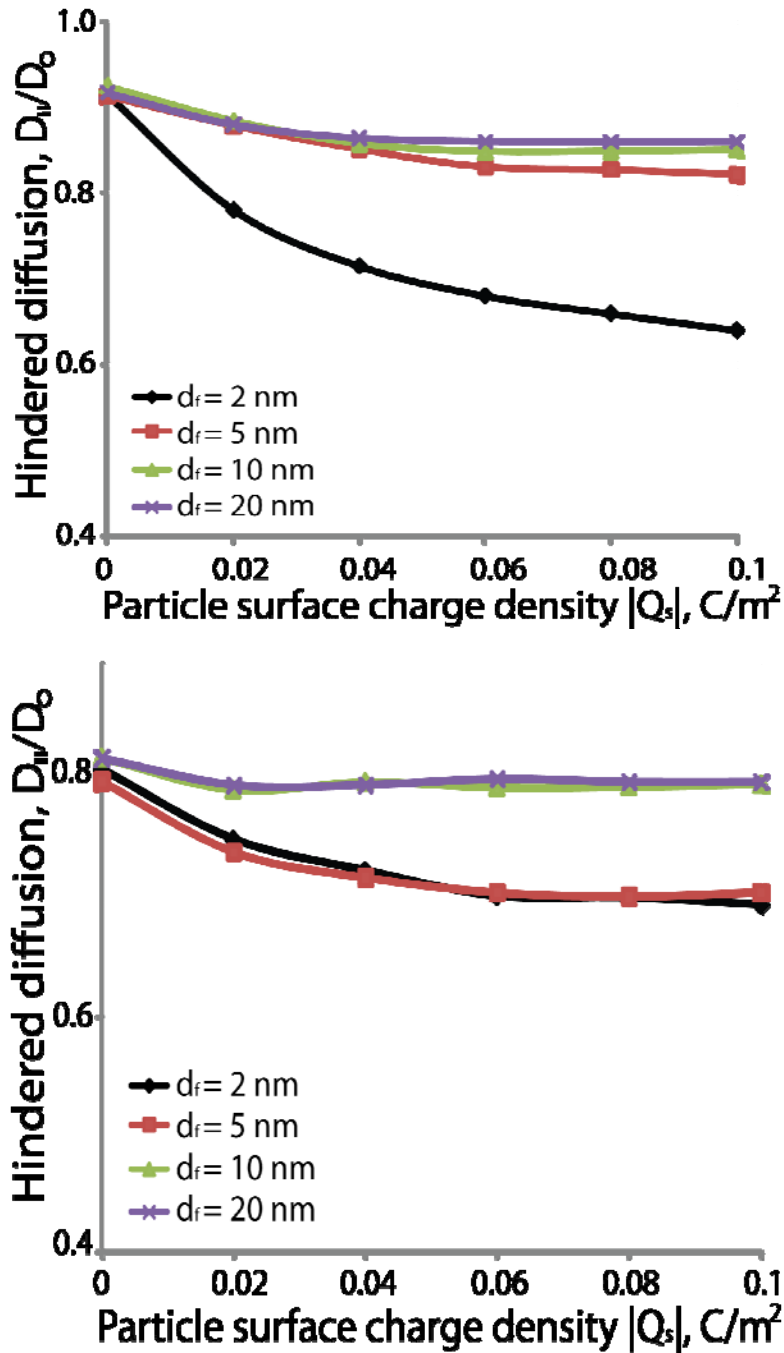

Effect of electrostatic interactions to the hindered diffusion of nanoparticles parallel to the preferred fiber direction. The fiber surface charge density was taken to be  $-0.05 C/m^2$ , the ionic strength of the solution was set to 0.15M and  $\lambda$  was 0.5. The fiber volume fractions were 0.03 (top) and 0.06 (bottom). Hindered diffusion is the ratio of the overall diffusion coefficient in the fibrous medium parallel to the fiber direction,  $D_{||}$ , over the diffusion coefficient in solution,  $D_0$ .

Supplementary figure 4

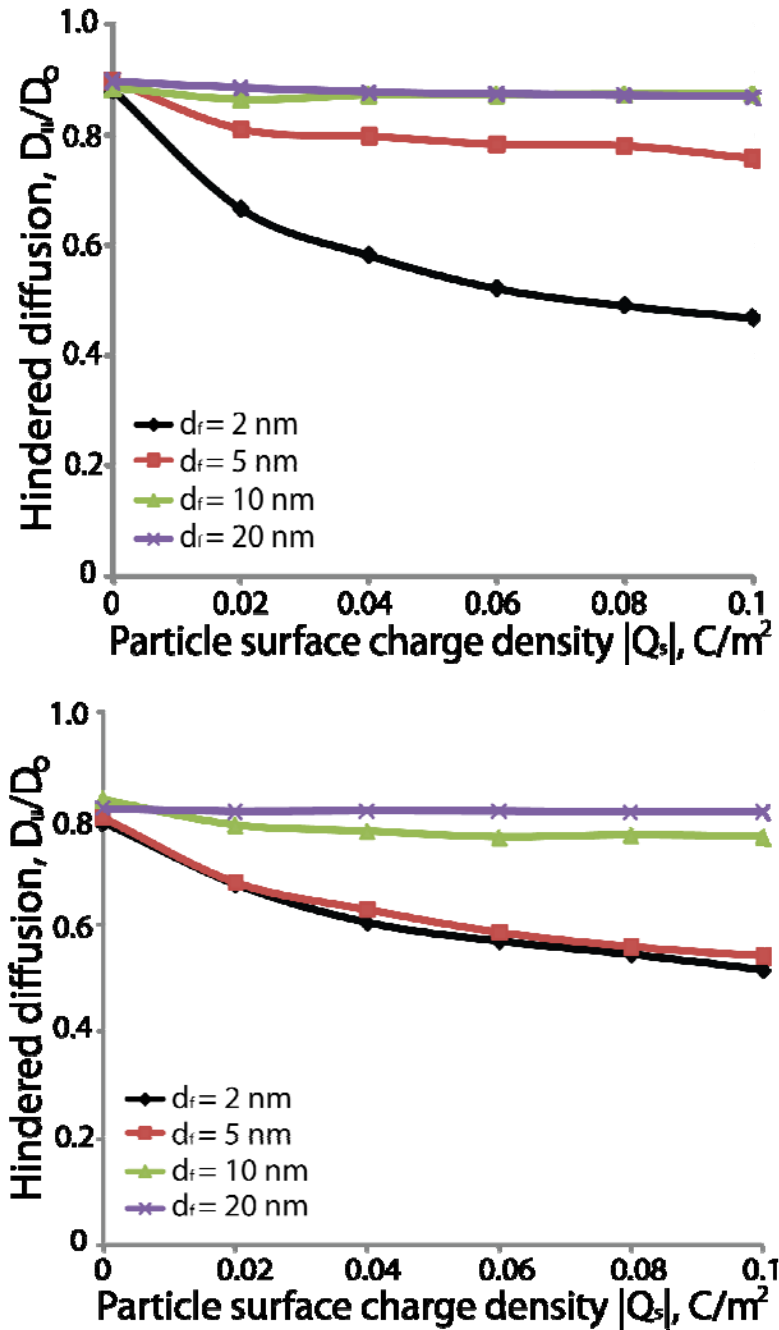

Effect of electrostatic interactions to the hindered diffusion of nanoparticles parallel to the preferred fiber direction. The fiber surface charge density was taken to be  $-0.05 C/m^2$ , the ionic strength of the solution was set to 0.02M and  $\lambda$  was 0.5. The fiber volume fractions were 0.03 (top) and 0.06 (bottom). Hindered diffusion is the ratio of the overall diffusion coefficient in the fibrous medium parallel to the fiber direction,  $D_{||}$ , over the diffusion coefficient in solution,  $D_0$ .

**Supplementary figure 5**

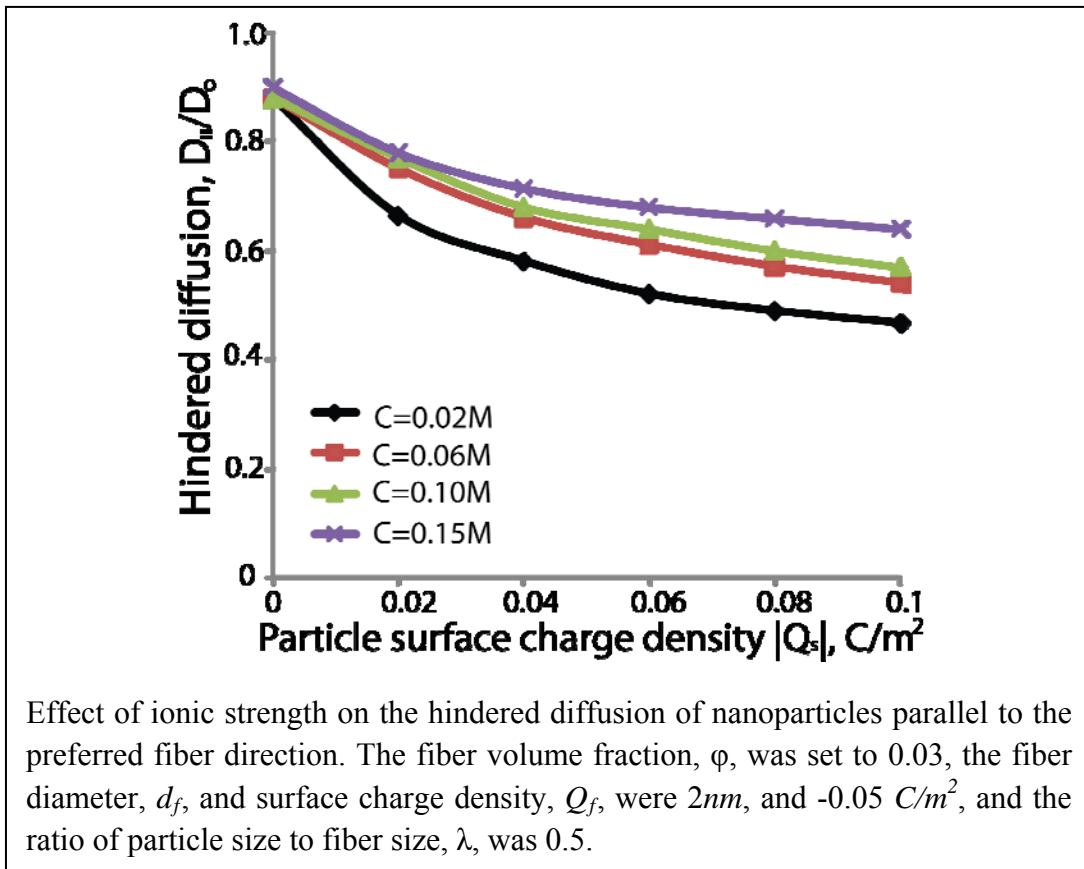

**Supplementary figure 6**

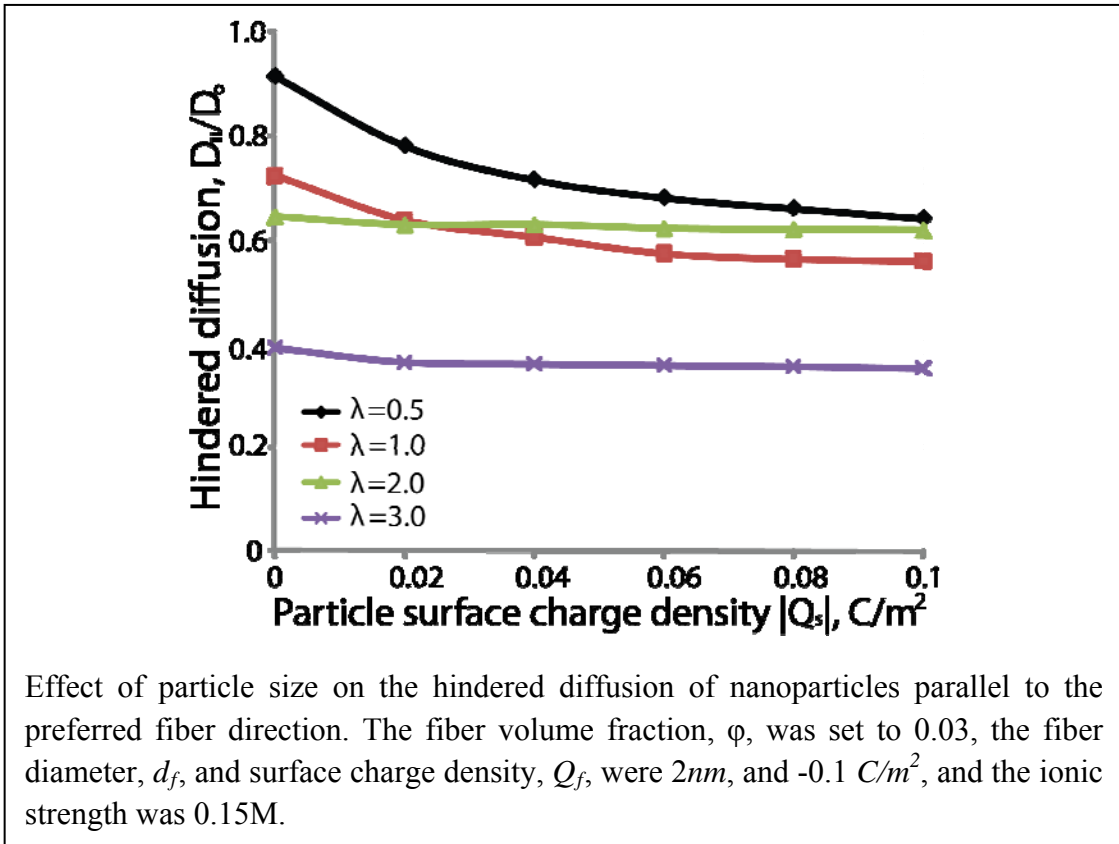

Supplement: mmc1.pdf [file mmc1.pdf]
